# Supplementary material
Source: PubMed Central journal article supplement (PMC5628792)
Supplement: mmc1.pdf [file mmc1.pdf]

YMTHE, Volume 25

## **Supplemental Information**

### **Obestatin Increases the Regenerative Capacity of Human Myoblasts Transplanted Intramuscularly in an Immunodeficient Mouse Model**

**Icia Santos-Zas, Elisa Negroni, Kamel Mamchaoui, Carlos S. Mosteiro, Rosalia Gallego, Gillian S. Butler-Browne, Yolanda Pazos, Vincent Mouly, and Jesus P. Camiña**

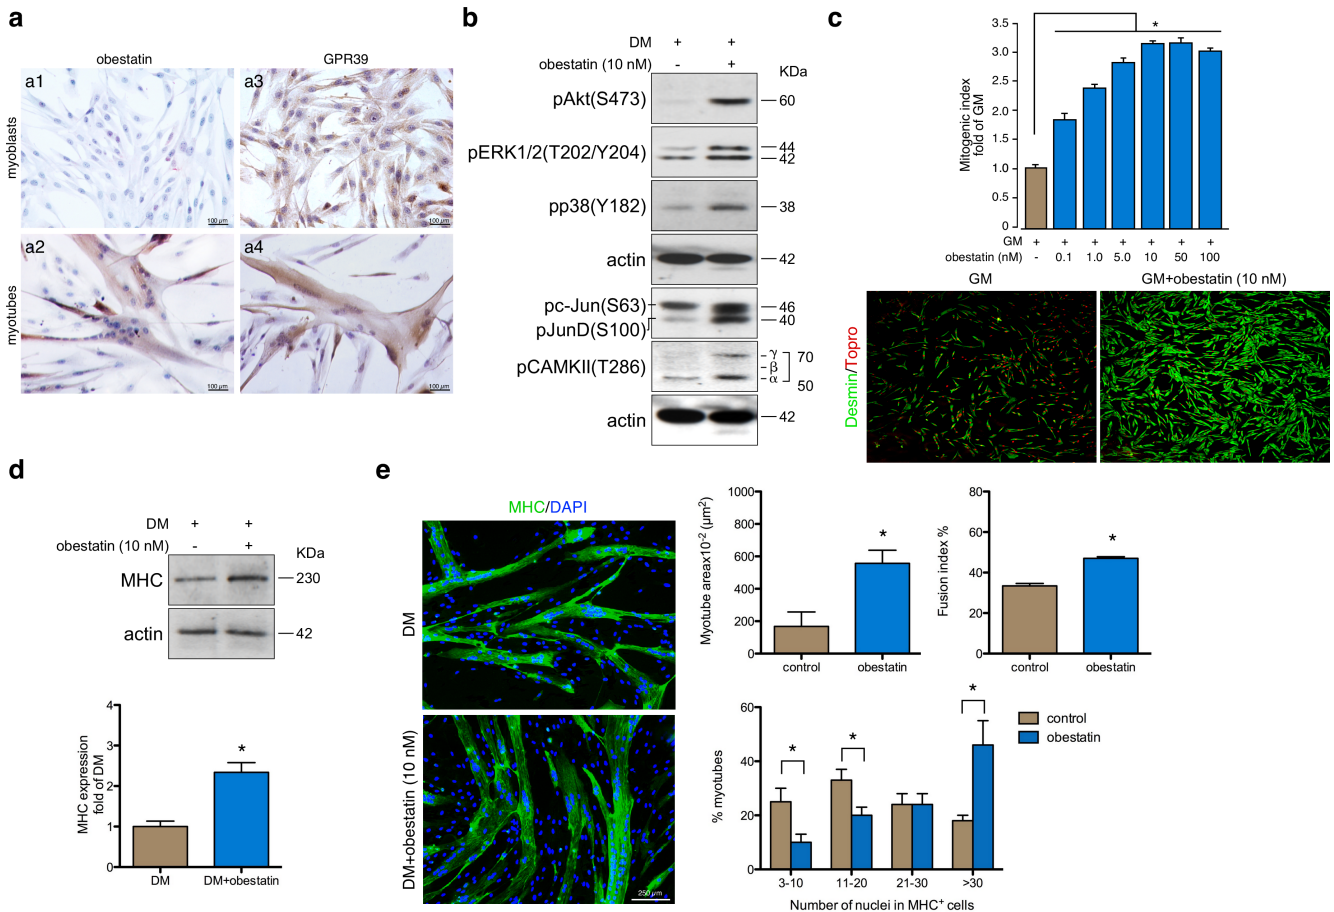

**Figure S1 Validation of obestatin/GPR39 functionality in human primary myoblasts.** (a) Immunocytochemical detection of obestatin and GPR39 in human primary myoblasts (a1 and a3) and myotubes (a2 and a4) (C25 cells). (b) Immunoblot analysis of the effect of obestatin (10 nM, 5 min) on the activation of Akt [pAkt(S473)], ERK1/2 [pERK1/2(T202/Y204)], p38 [pp38(Y182)], c-Jun [pc-Jun(S63) and pJunD(S100)] and CAMKII [pCAMKII(T286):  $\alpha$ ,  $\beta$  and  $\gamma$  isoforms] in human primary myoblasts (C25 cells). (c) *Upper panel*, dose-response effect of obestatin (0.1–100 nM) in human primary myoblast (C25 cells) proliferation (48 h, n=5). Quantification of cell number was carried out by cell counting using desmin, marker for myoblasts, and Topro to counterstain nuclei (*lower panel*). (d) Effect of obestatin (10 nM) on differentiating human primary myoblasts (C25 cells). MHC expression was determined by immunoblot 6 days after stimulation (n=3). (e) *Left panel*, immunofluorescence detection of MHC in human primary myotubes in DM (control) or DM + obestatin (10 nM) 6 days after stimulation (n=6). DAPI was used to counterstain nuclei. *Right panel*, the extent of differentiation was evaluated by the MHC<sup>+</sup> myotube area (*left upper panel*), fusion index (*right upper panel*) and the percentages of MHC<sup>+</sup> myotubes containing the indicated numbers of nuclei (*bottom panel*). Data in c, d and e are expressed as mean  $\pm$  SEM. \**P* < 0.05 versus control values.

Table S1

| Antibody                              | Application | Dilution | Species specificity | Species origin and immunoglobulin isotype | Supplier          | Reference   |
|---------------------------------------|-------------|----------|---------------------|-------------------------------------------|-------------------|-------------|
| Actin                                 | WB          | 1:5000   | Human               | Rabbit polyclonal IgG                     | Abcam             | ab1801      |
| Desmin                                | ICC/IF      | 1:300    | Human               | Rabbit polyclonal IgG                     | Abcam             | 15200       |
| DVL2                                  | WB          | 1:500    | Human               | Rabbit monoclonal                         | Cell Signaling    | 3224        |
| GPR39                                 | ICC         | 1:100    | Human               | Rabbit polyclonal IgG                     | Abcam             | ab39227     |
| ki67 Clone MIB1                       | IHCf/r/Fl   | 1:100    | Human/mouse         | Mouse mAb IgG1                            | DAKO              | M7240       |
| Lamin A/C                             | IHCf/r/Fl   | 1:100    | Human               | Mouse mAb IgG2b                           | Novocastra, Leica | NCL-LAM-A/C |
| Lamin A/C                             | IHCf/r/Fl   | 1:200    | Human               | Rabbit polyclonal IgG                     | Abcam             | ab108595    |
| Laminin                               | IHCf/r/Fl   | 1:200    | Human/mouse         | Rabbit polyclonal IgG                     | DAKO              | Z0097       |
| Myogenin                              | IHCf/r/Fl   | 1:200    | Human/mouse         | Mouse mAb IgG1                            | Hybridoma Bank    | F5D         |
| Myosin Heavy Chain                    | ICC/IF      | 1:200    | Human/mouse         | Mouse mAb IgG2b                           | Hybridoma Bank    | MF20        |
| Myosin Heavy Chain                    | IHCf/r/Fl   | 1:20     | Human/mouse         | Mouse mAb IgG2b                           | Hybridoma Bank    | MF20        |
| Obestatin                             | ICC         | 1:100    | Human               | Rabbit polyclonal IgG                     | Abcam             | ab41704     |
| Pax7                                  | IHCf/r/Fl   | 1:20     | Human               | Mouse mAb IgG1                            | Hybridoma Bank    | Pax-7       |
| pH3(S10)                              | IHCf/r/Fl   | 1:200    | Human/mouse         | Rabbit polyclonal IgG                     | Molipore          | 06-570      |
| Rac1                                  | WB          | 1:1000   | Human               | Mouse mAb IgG2b                           | Thermo            | 1862341     |
| Rho                                   | WB          | 1:1000   | Human/mouse         | Rabbit polyclonal IgG                     | Thermo            | 1862332     |
| Cleaved caspase-3 (Asp175)            | IHCf/r/Fl   | 1:500    | Human/mouse         | Rabbit polyclonal IgG                     | Cell Signaling    | 9661        |
| Spectrin                              | IF          | 1:1000   | Human               | Mouse mAb IgG2b                           | Novocastra, Leica | NCL-SPEC1   |
| Secondary antibody                    | Use         | Dilution |                     |                                           | Supplier          | Ref         |
| Anti-rabbit HRP                       | WB          | 1:10000  | Rabbit              | Goat polyclonal Cy3                       | Jackson           | 11-035-003  |
| Goat anti-mouse Alexa Fluor 488 IgG2b | IHCf/r/Fl   | 1:1000   | Mouse               | Goat polyclonal Alexa 488                 | Life Technologies | A21141      |
| Goat anti-mouse Alexa Fluor 594 IgG1  | IHCf/r/Fl   | 1:1000   | Mouse               | Goat polyclonal Alexa 594                 | Life Technologies | A21125      |
| Goat anti-rabbit Alexa Fluor 594      | IHCf/r/Fl   | 1:1000   | Rabbit              | Goat polyclonal Cy3                       | Abcam             | 150089      |

**Applications key:** ICC: immunocytochemistry; ICC/IF: cell-immunofluorescence; IHCf: immunohistochemistry-frozen tissue; IHCf/r/Fl: frozen tissue-immunofluorescence; WB: western blot; Ig: immunoglobulin; mAb: monoclonal antibody
